# Supplementary material for: Synthesis of novel hybrid mesoporous gold iron oxide nanoconstructs for enhanced catalytic reduction and remediation of toxic organic pollutants
Source: Royal Society of Chemistry journal article supplement (doi:10.1039/d2ra05990h), 2022-01-01
Supplement: d2ra05990h1.pdf [file d2ra05990h1.pdf]

## Supporting Information

### **Synthesis of novel hybrid mesoporous gold iron oxide nanoconstructs for enhanced catalytic reduction and remediation of toxic organic pollutants**

Kheireddine El-Boubbou,<sup>abc\*</sup> O. M. Lemine,<sup>d</sup> and Daniel Jaque<sup>b</sup>

<sup>a</sup>King Saud bin Abdulaziz University for Health Sciences (KSAU-HS) & King Abdullah International Medical Research Center (KAIMRC), King Abdulaziz Medical City, National Guard Health Affairs, Riyadh 11426, Saudi Arabia

<sup>b</sup>Nanomaterials for Bioimaging Group (nanoBIG), Facultad de Ciencias, Departamento de Física de Materiales, Universidad Autónoma de Madrid (UAM), Madrid 28049, Spain

<sup>c</sup>Department of Chemistry, College of Science, University of Bahrain, Sakhir 32038, Kingdom of Bahrain

<sup>d</sup>Department of Physics, College of Sciences, Imam Mohammad Ibn Saud Islamic University (IMSIU), Riyadh 11623, Saudi Arabia

Correspondence\* E-mail: [elboubboukh@ngha.med.sa](mailto:elboubboukh@ngha.med.sa)

## TEM

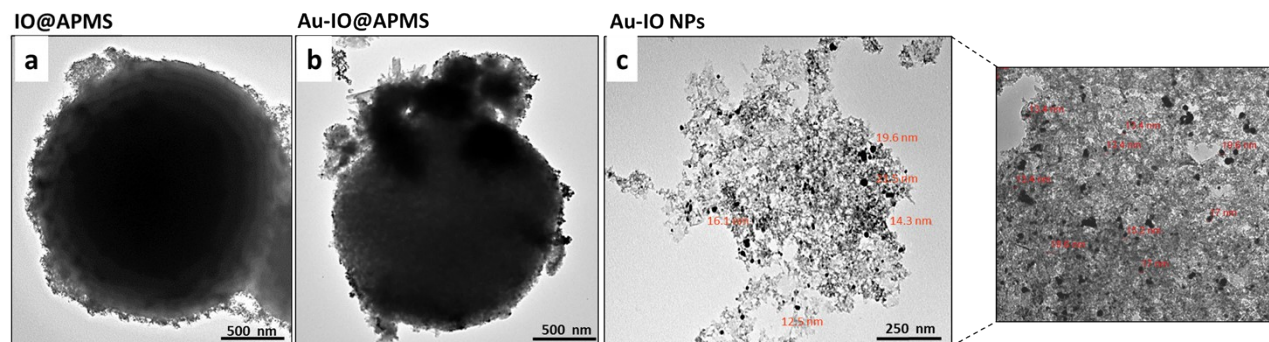

**Figure S1.** TEM images of the mesoporous Au-IO samples: a) IO@APMS-Amine, b) Au-grafted IO@APMS, and c) Au-IO NPs. The images clearly show the grafting of AuNPs (15-20 nm) onto IO@APMS-Amine and the successful etching to afford Au-IO mesostructures.

## EDX Elemental Analysis

### Au-IO@APMS

| Element | Weight % | Atomic % |
|---------|----------|----------|
| O       | 43.7     | 72.0     |
| Si      | 11.7     | 11.1     |
| Fe      | 32.1     | 15.2     |
| Au      | 12.5     | 1.7      |

### Au-IO NPs

| Element | Weight % | Atomic % |
|---------|----------|----------|
| O       | 36.6     | 70.6     |
| Si      | 0.5      | 0.5      |
| Fe      | 48.3     | 26.6     |
| Au      | 14.6     | 2.3      |

**Table S1.** EDX elemental analysis of the Au-incorporated IO samples selected from their respective SEM images.

## DLS and Zeta Potential

### IO@APMS-Amine & Au-IO@APMS

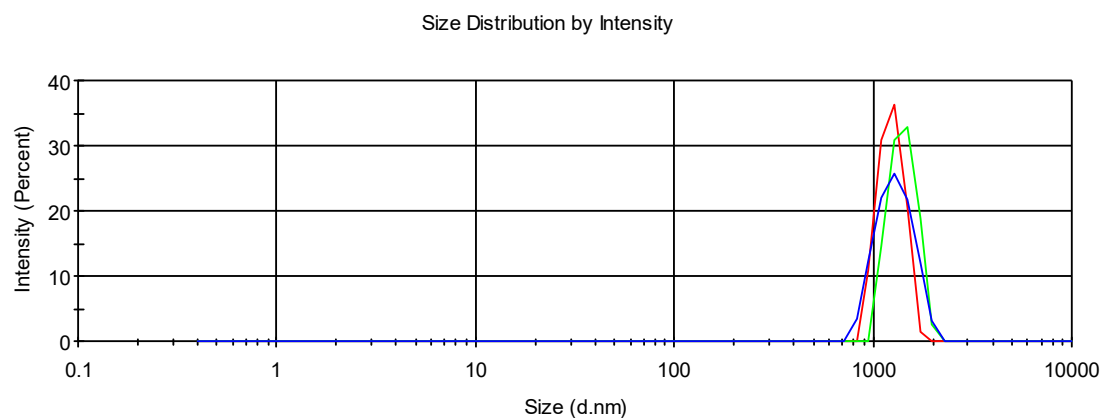

### Mesoporous Au-IO NPs

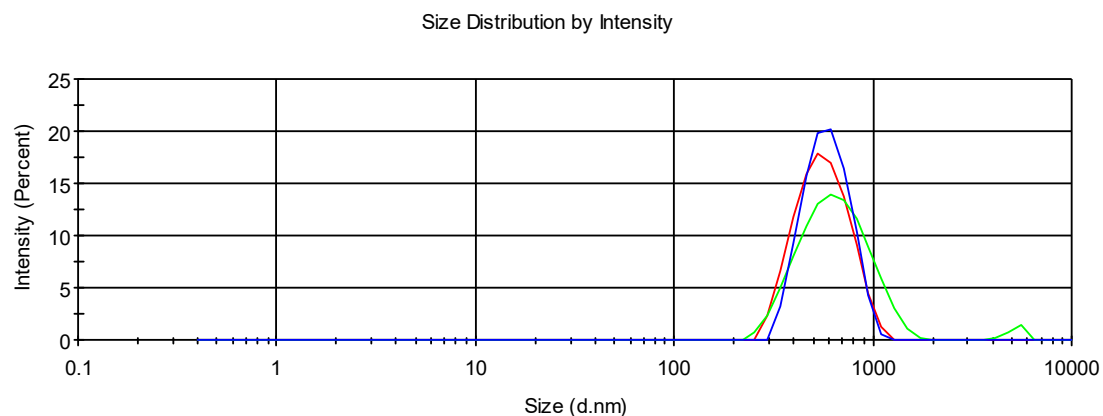

**Figure S2.** A) DLS measurements of the three different mesoporous IO@APMS-Amine, Au-IO@APMS, and Au-IO samples dispersed in aqueous media. IO@APMS-Amine ( $D_H = 1475 \pm 117$  nm), Au-IO@APMS ( $D_H = 1565 \pm 182$  nm), and Au-IO mesostructures ( $D_H = 710 \pm 55$  nm). Three independent measurements for three different concentrations were conducted reported as average means  $\pm$  Std. Dev.

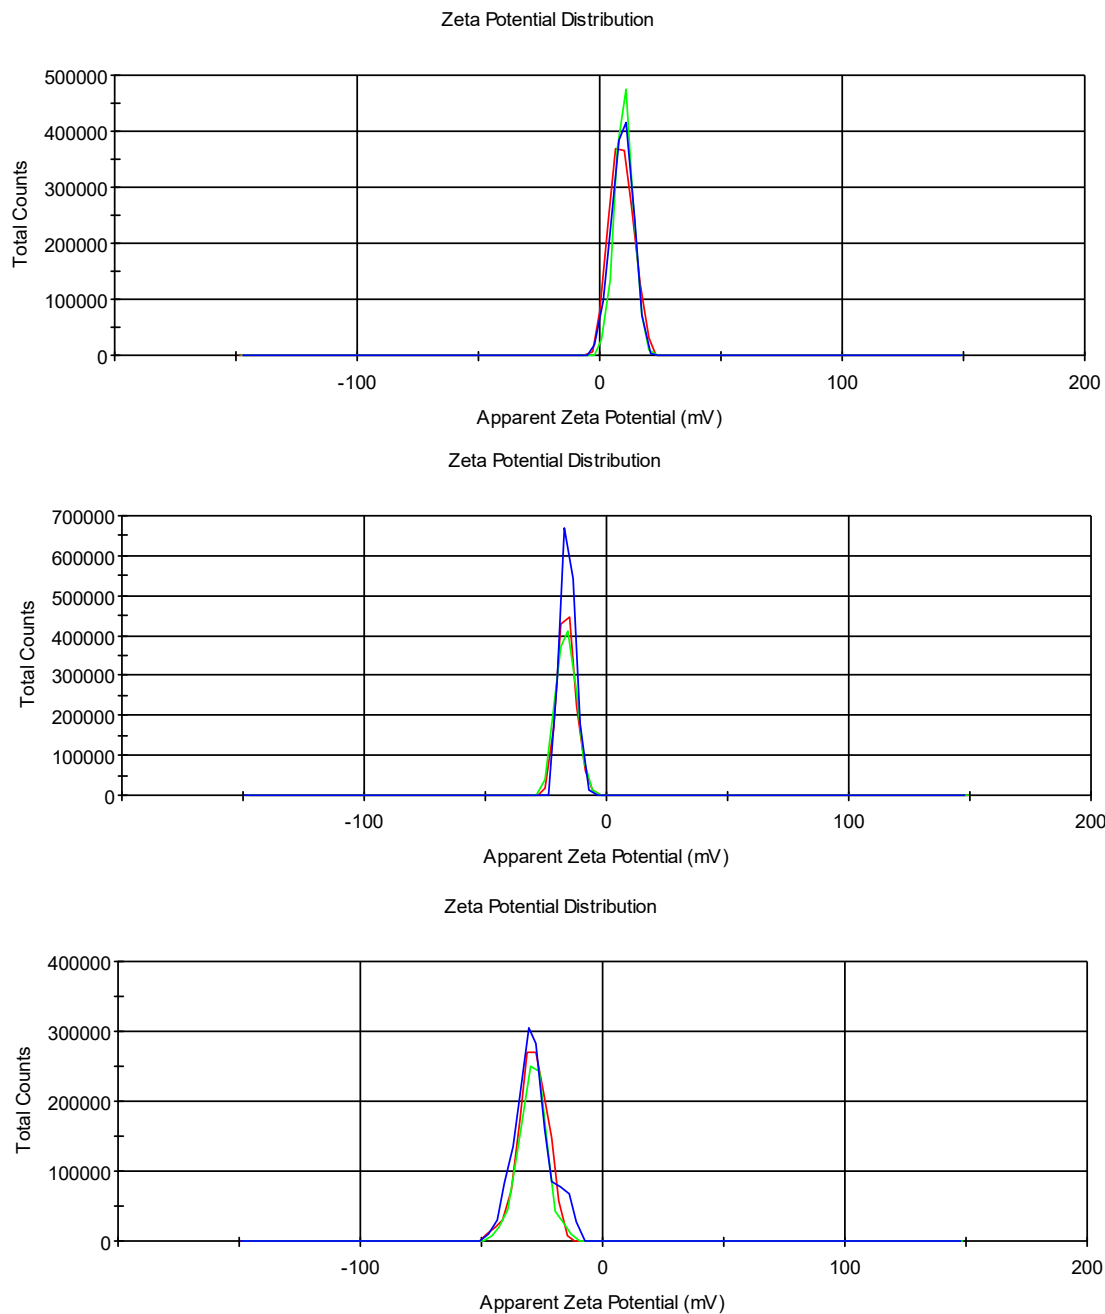

**Figure S2. B)** Zeta potential ( $\xi$ ) measurements of IO@APMS-Amine ( $\xi = +9.40 \pm 0.56$  mV), Au-IO@APMS ( $\xi = -16.8 \pm 0.50$  mV), and Au-IO mesostructures ( $-26.4 \pm 0.98$  mV). Three independent measurements for three different concentrations were conducted reported as average means  $\pm$  Std. Dev.

## Magnetic Properties

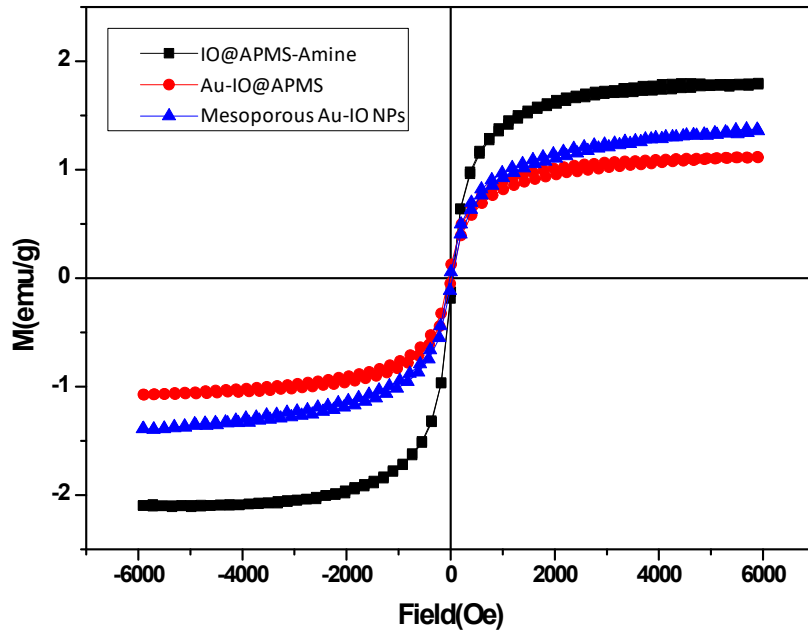

**Figure S3.** Field-dependent magnetization ( $M$ - $H$ ) hysteresis loops for the three different mesoporous samples clearly showing their superparamagnetic nature ( $M_s$  of IO@APMS-Amine = 1.85 emu/g, Au-IO@APMS = 1.09 emu/g, and mesoporous Au-IO = 1.36 emu/g).

## XRD

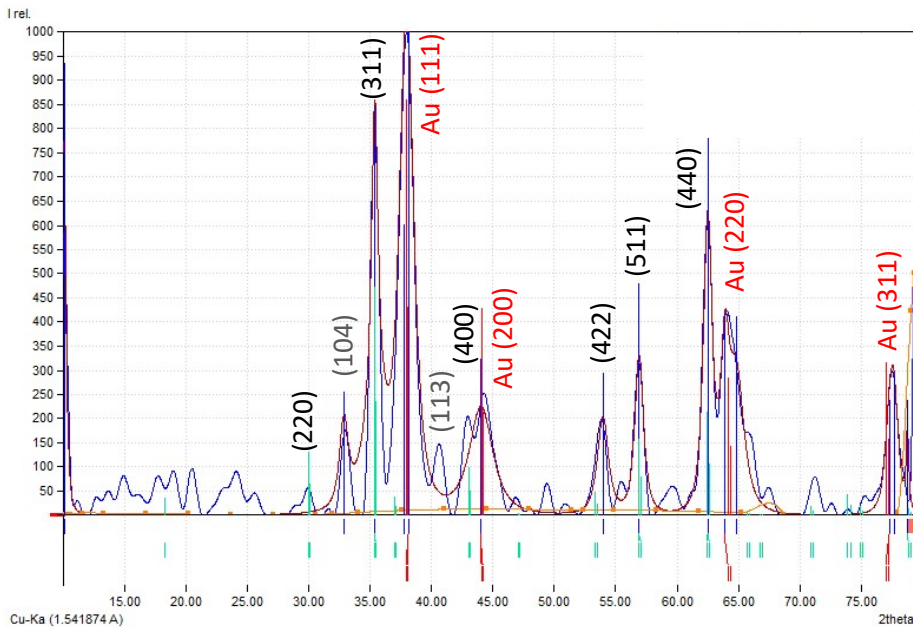

**Figure S4.** X-ray diffraction patterns showing  $\gamma$ -Fe<sub>2</sub>O<sub>3</sub> maghemite (black) and Au phases (red).

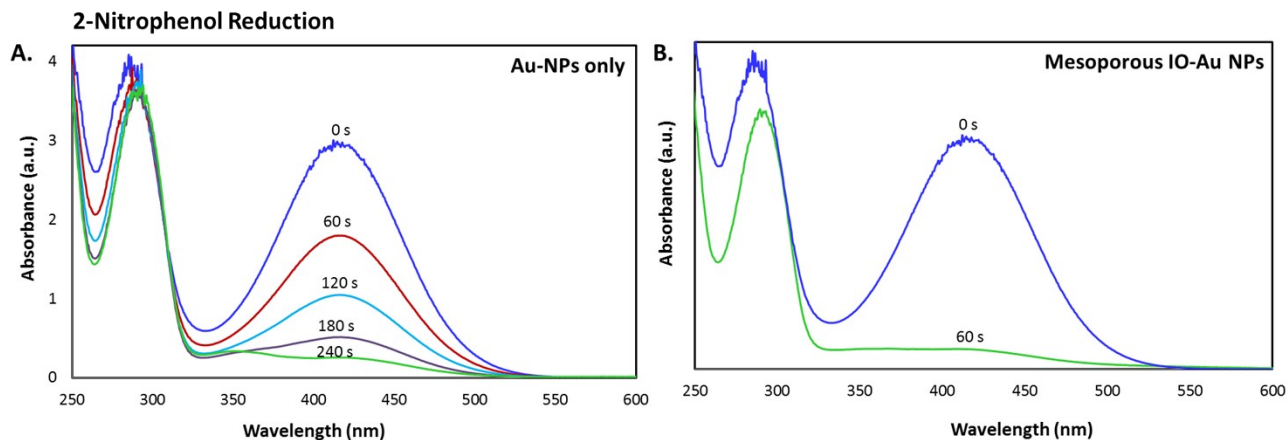

**Figure S5.** Time progressive UV-vis absorption spectra of 2-nitrophenol reduction using same concentrations of Au-NPs only and mesoporous IO-Au NPs. Reaction conditions: 2.5 mM of nitrophenol solution, 25 mM of freshly prepared  $\text{NaBH}_4$  (excess), 1.5 mg of catalyst, total volume = 1 mL.

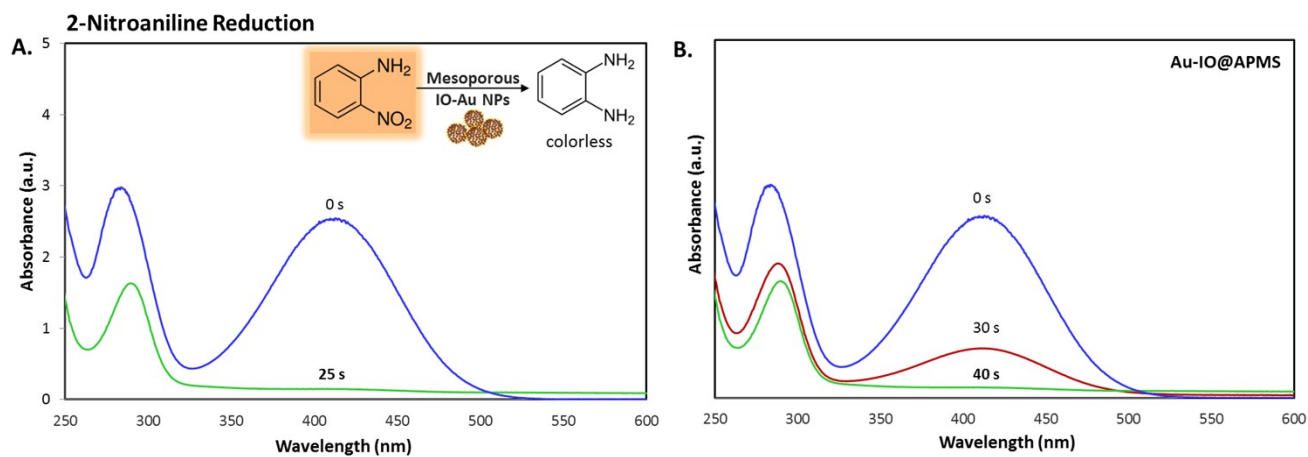

**Figure S6.** Time progressive UV-vis absorption spectra of 2-nitroaniline reduction using mesoporous nanocatalysts a) IO-Au NP and b) Au-IO@APMS. Reaction conditions: 2.5 mM of nitroaniline solution, 25 mM of freshly prepared  $\text{NaBH}_4$  (excess), 1.5 mg of catalyst, total volume = 1 mL.
